# Supplementary material for: Assessment of dicarbonyl contributions to secondary organic aerosols over China using RAMS-CMAQ
Source: Copernicus journal article supplement (doi:10.5194/acp-2018-1106), 2018-11-12

# **1.The comparasion of temperature, relative humidity, wind speed, wind direction and PM<sub>2.5</sub> between simulations and observations at 12 stations duiring the two analyzed episodes.**

1) Fig. S1 Temperature:

Episode 1:

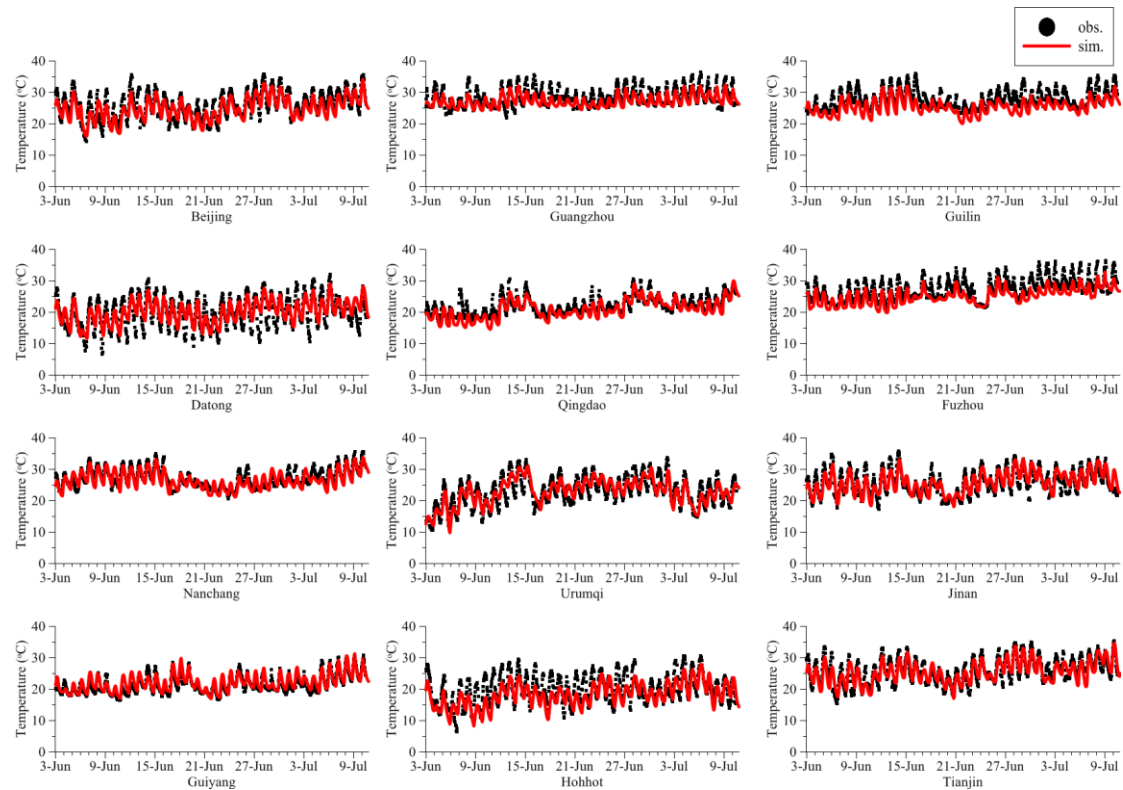

Episode 2:

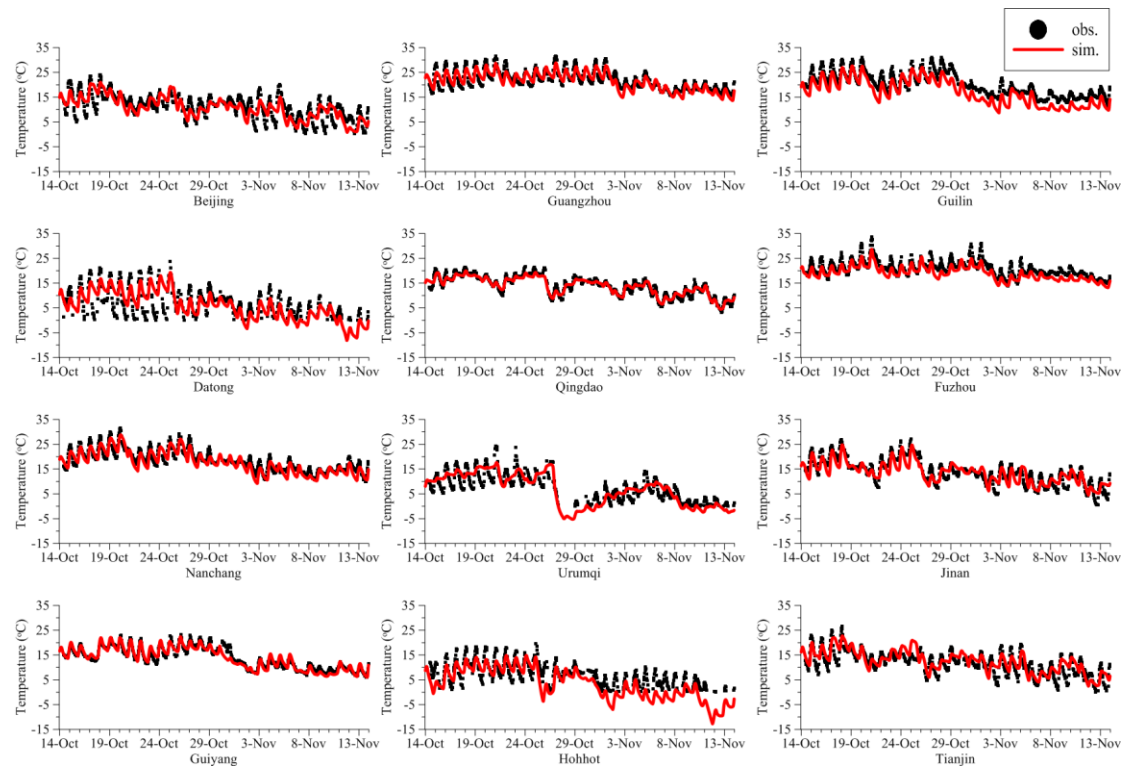

2) Fig. S2 Relative Humidity:

## Episode 1:

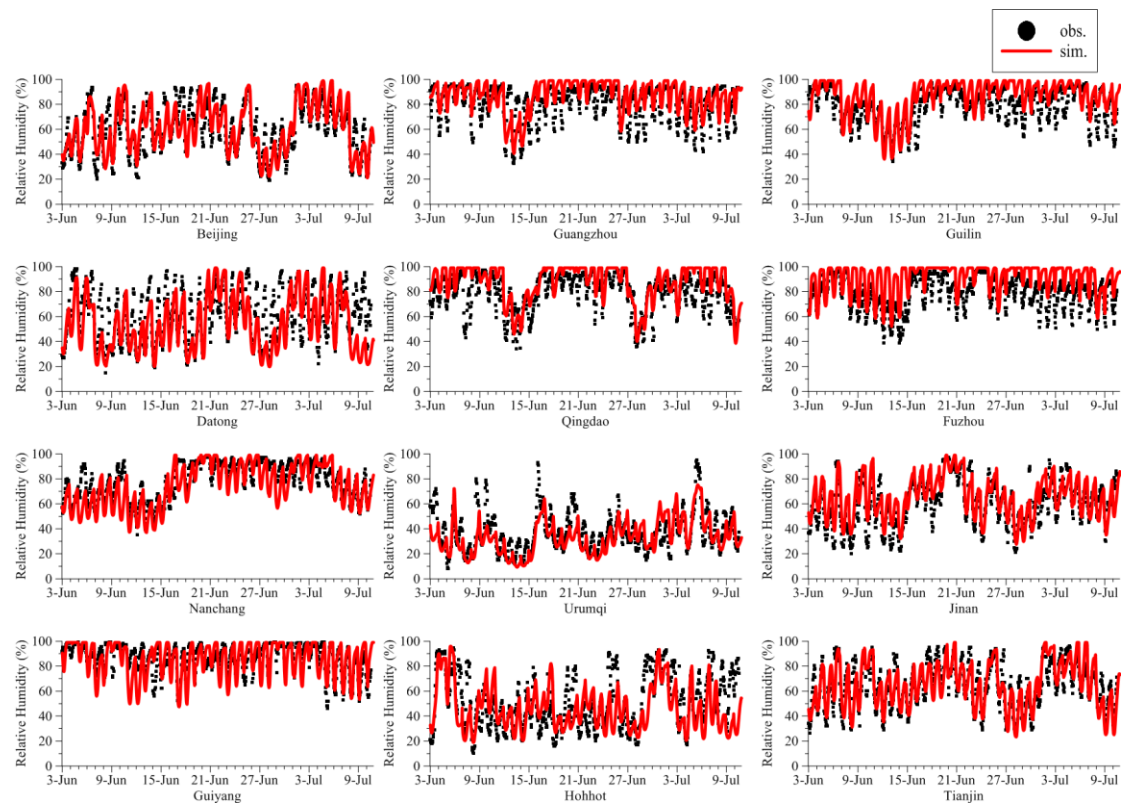

## Episode 2:

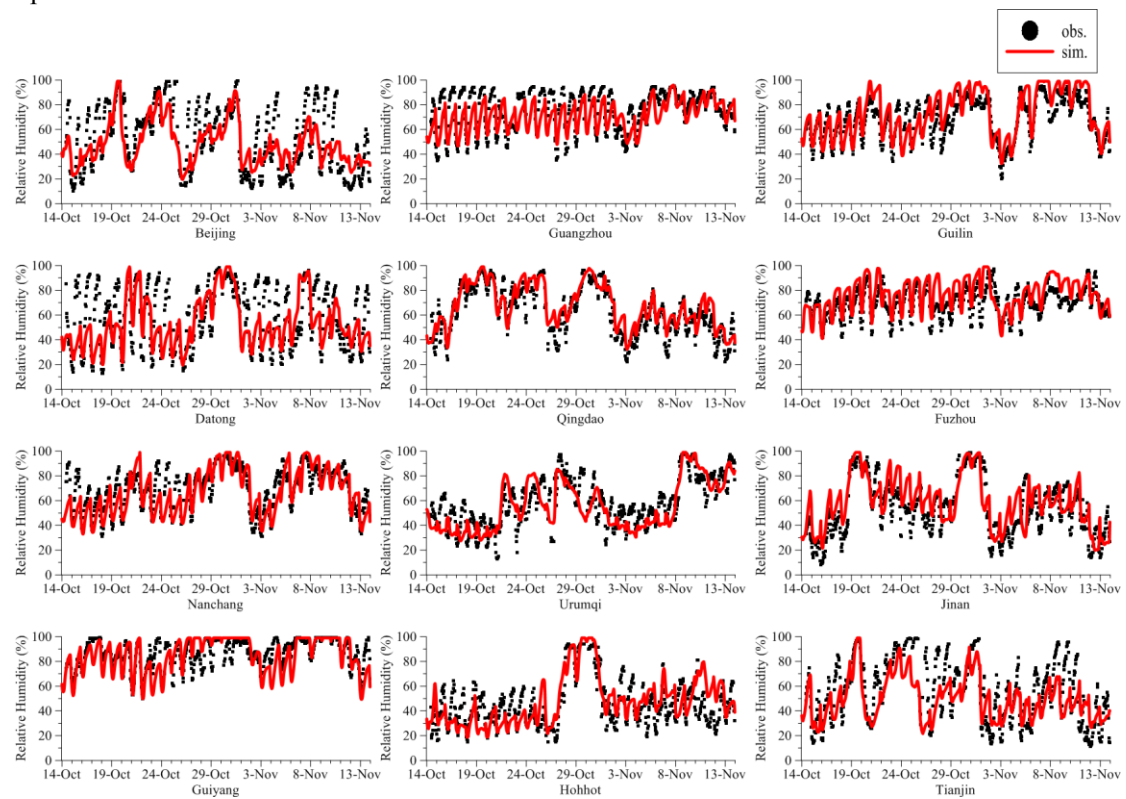

## 3) Fig. S3 Wind Speed:

### Episode 1:

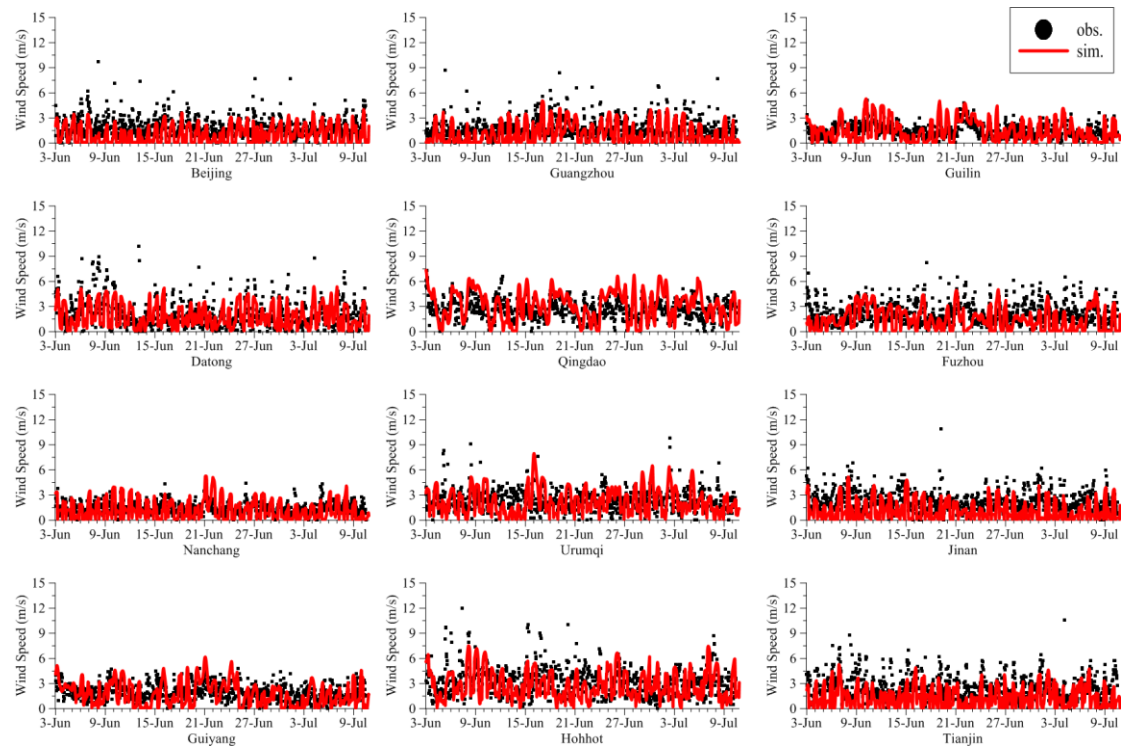

Episode 2:

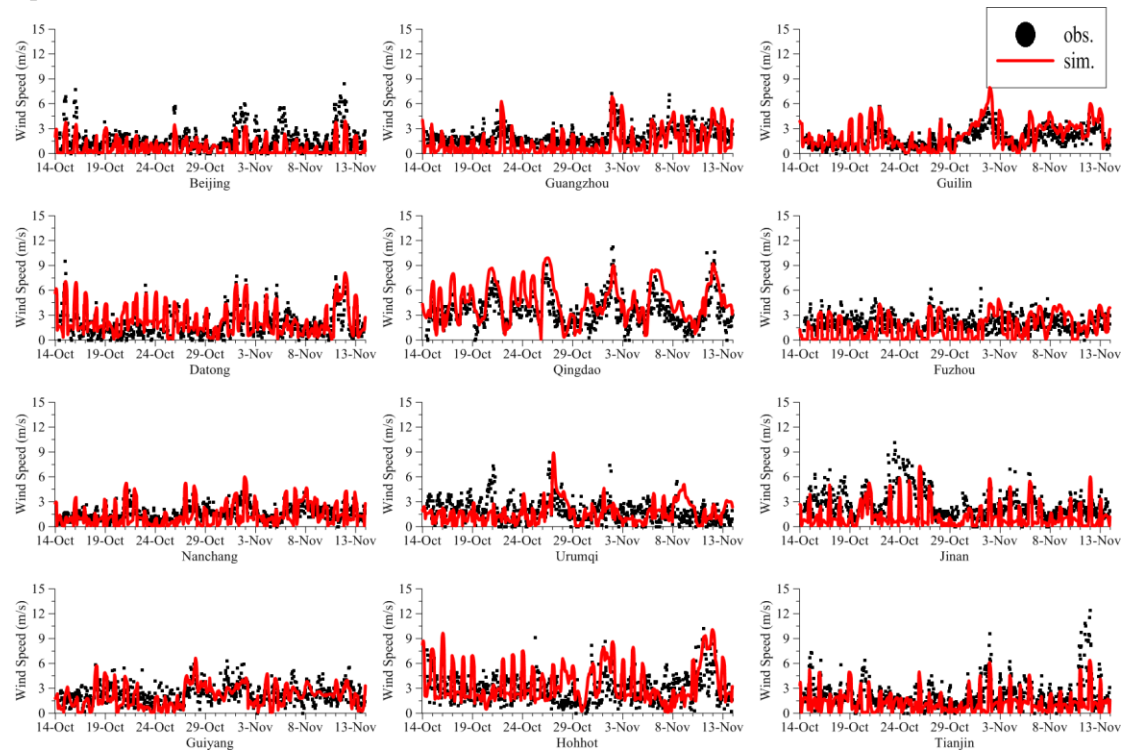

4) Fig. S4 Wind Direction:

Episode 1:



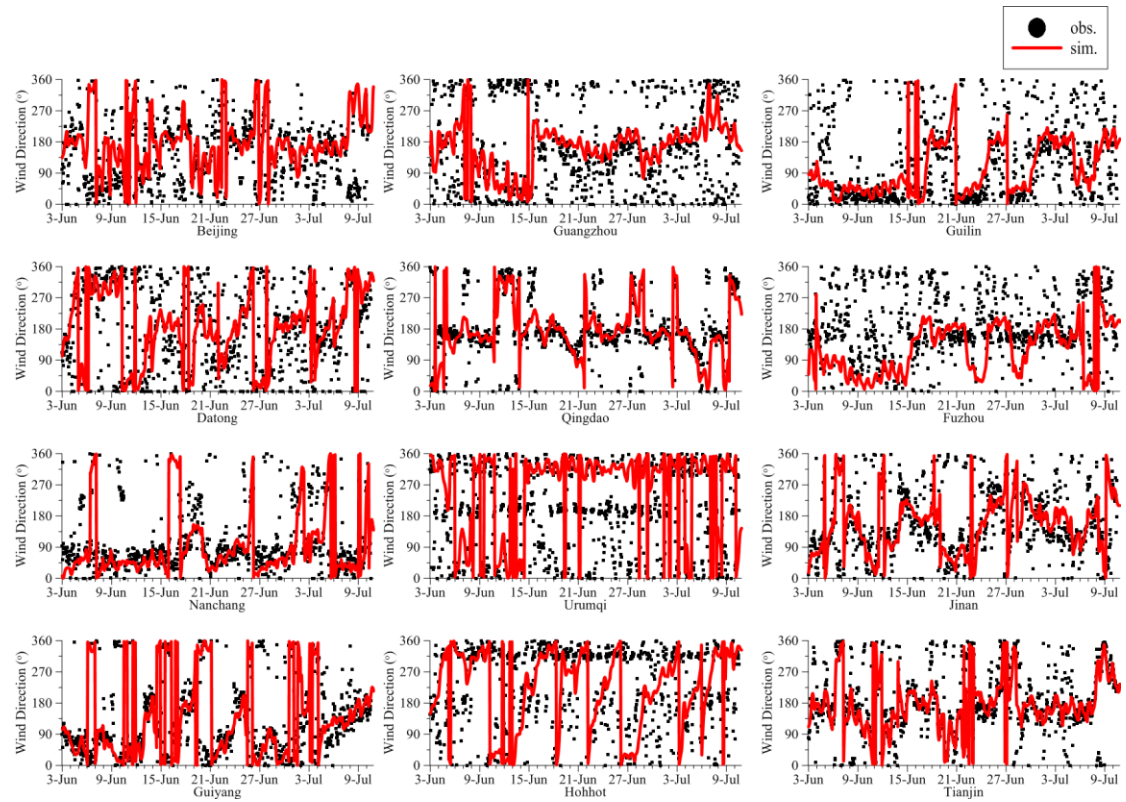

Episode 2:

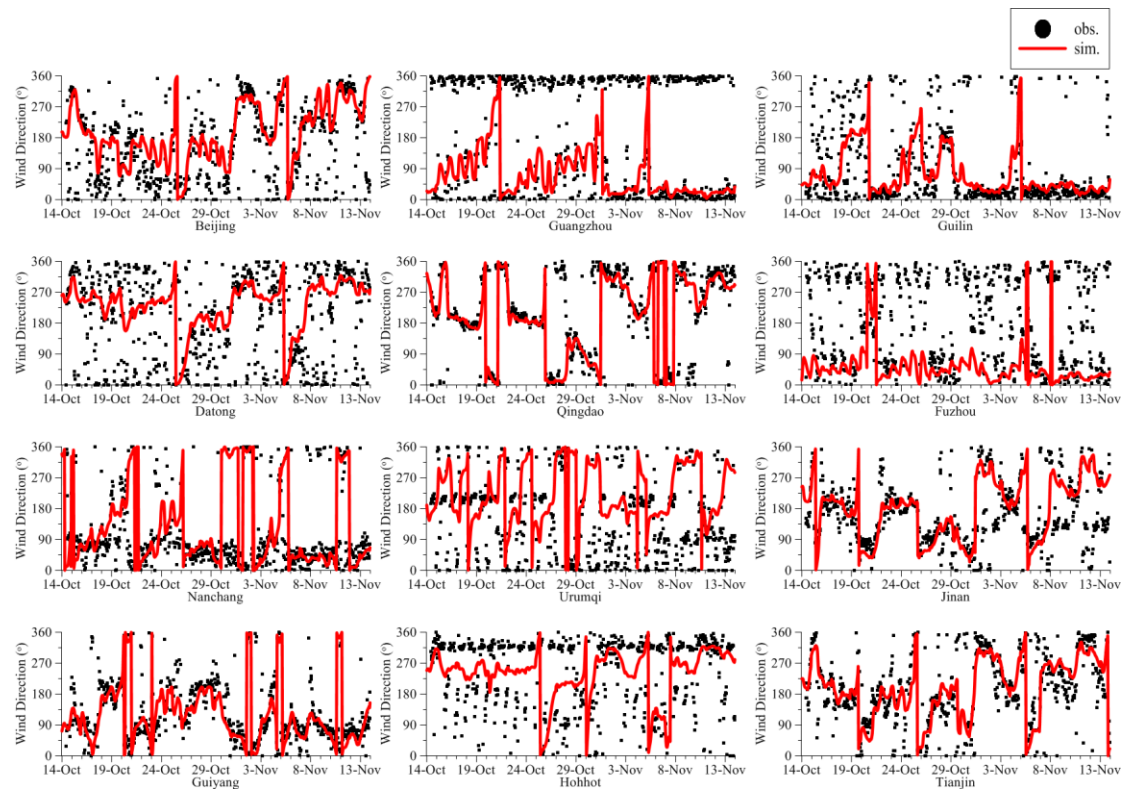

5) Fig. S5 PM<sub>2.5</sub>:

Episode 1:

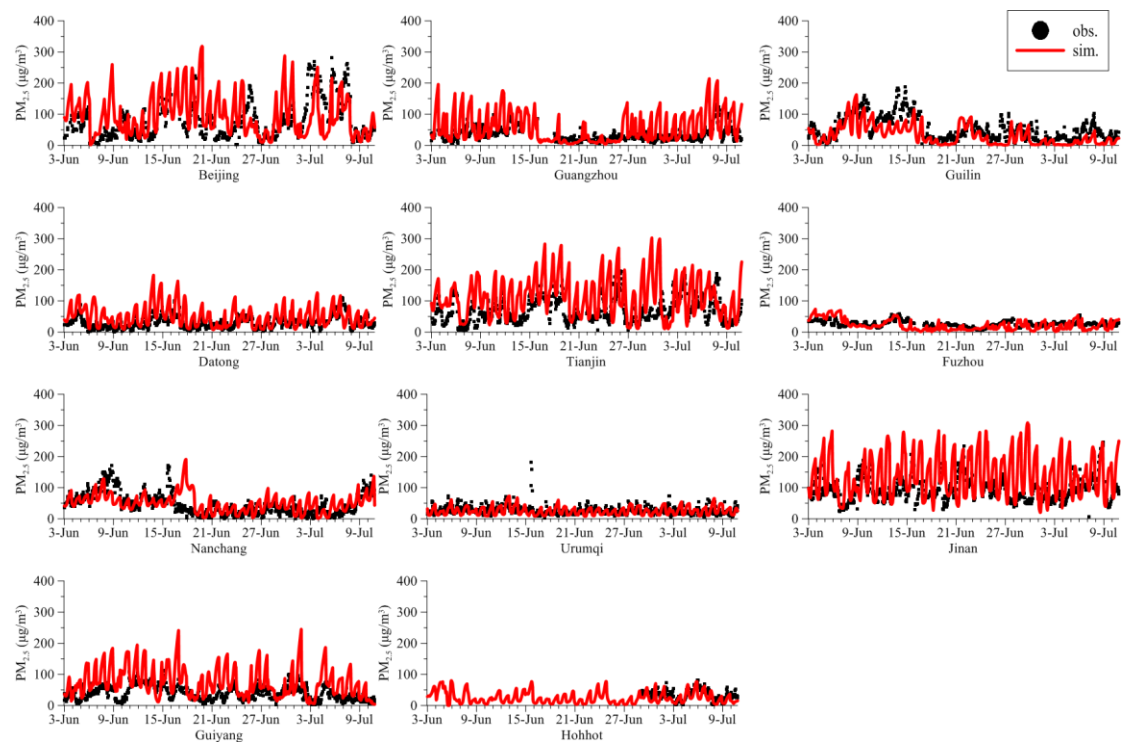

## Episode 2:

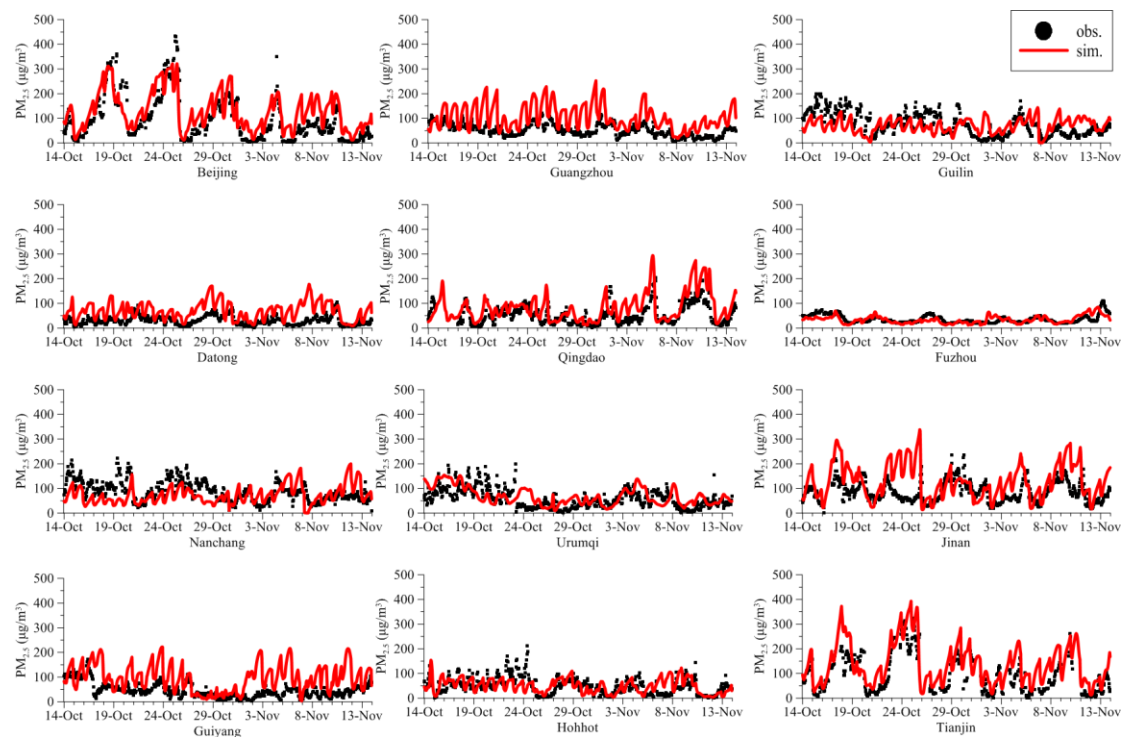

Supplement: Supplementary file 1 [file acp-2018-1106-supplement.pdf]
